# Supplementary material
Source: ML conference proceedings conference paper supplement (https://openreview.net/forum?id=XEfg5YE5Mw)

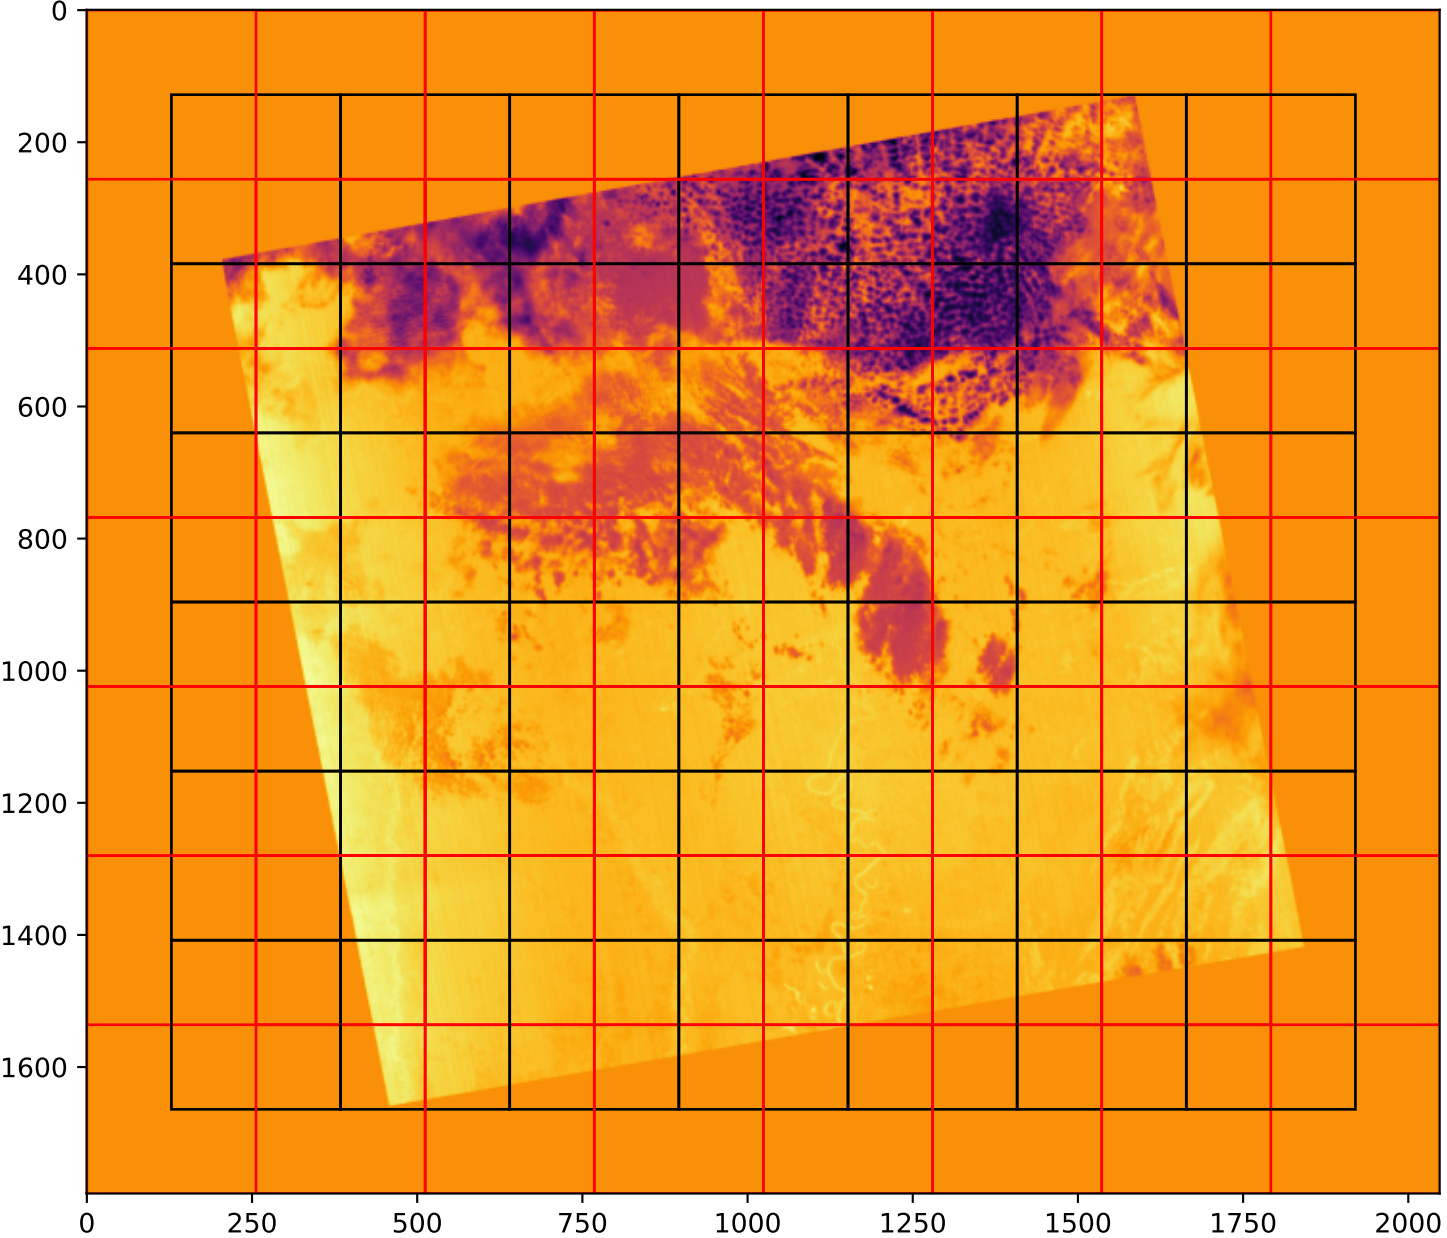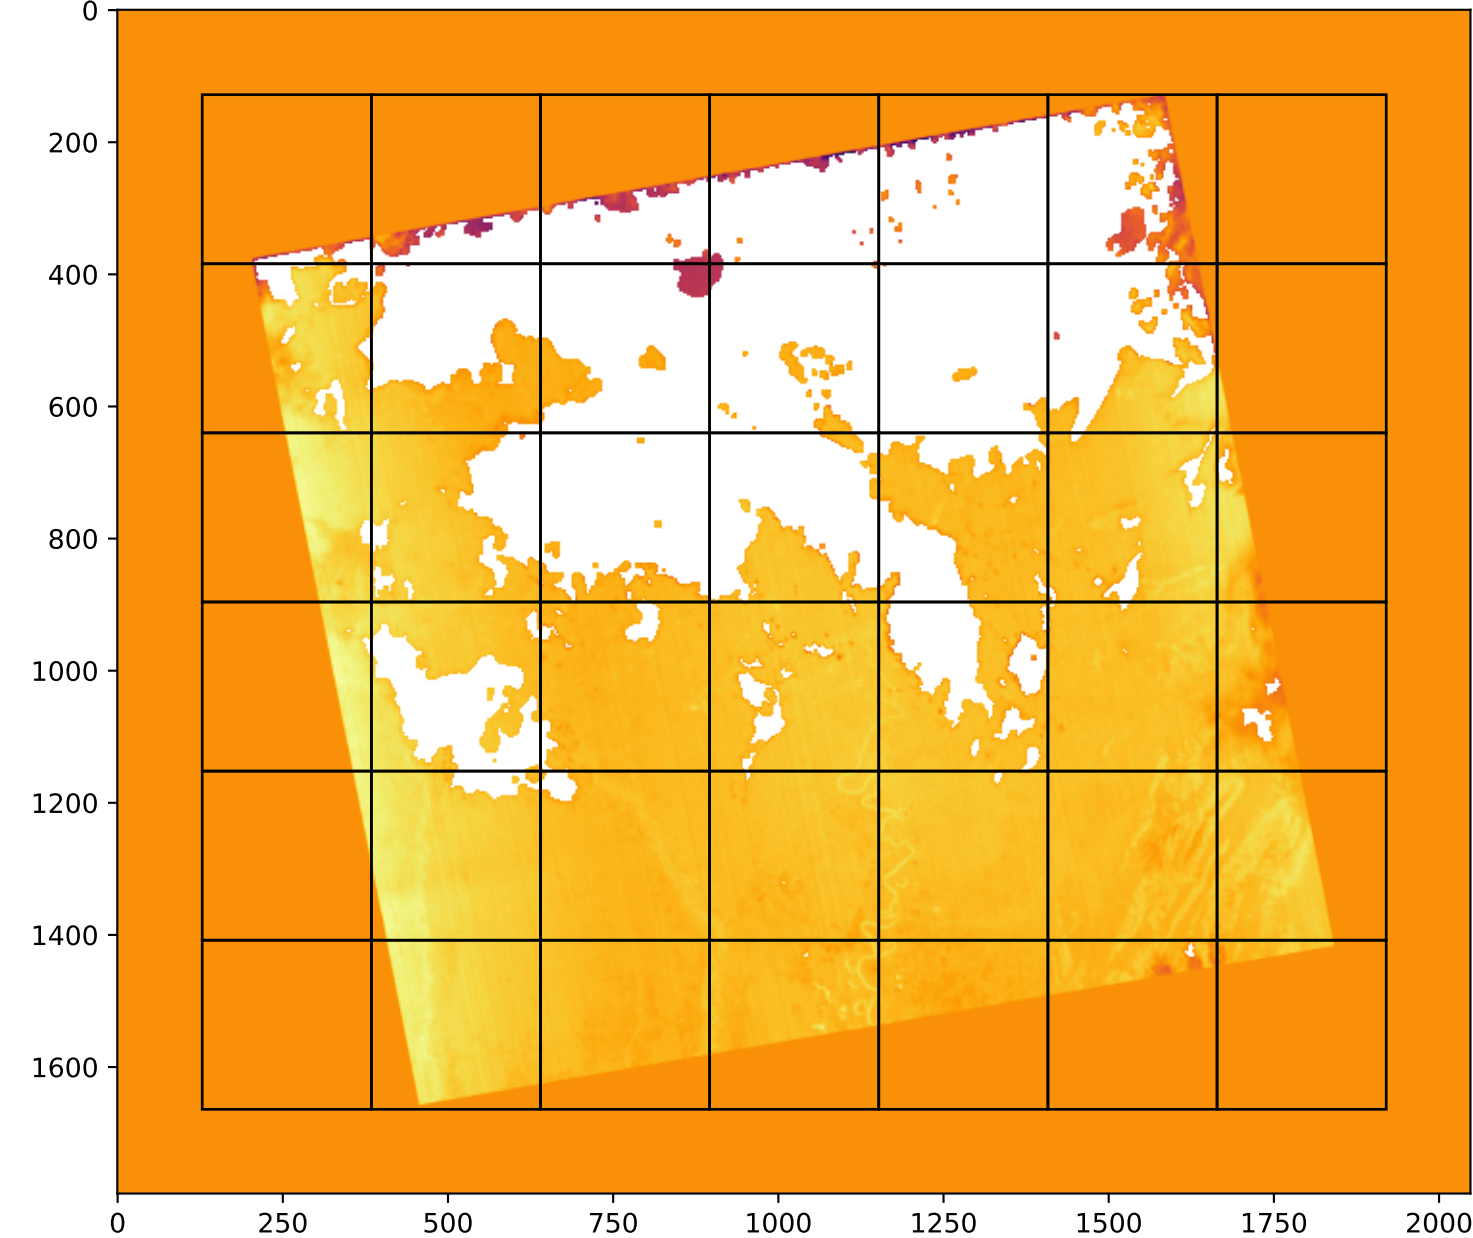

Supplement: supplementary_material [file attachment]

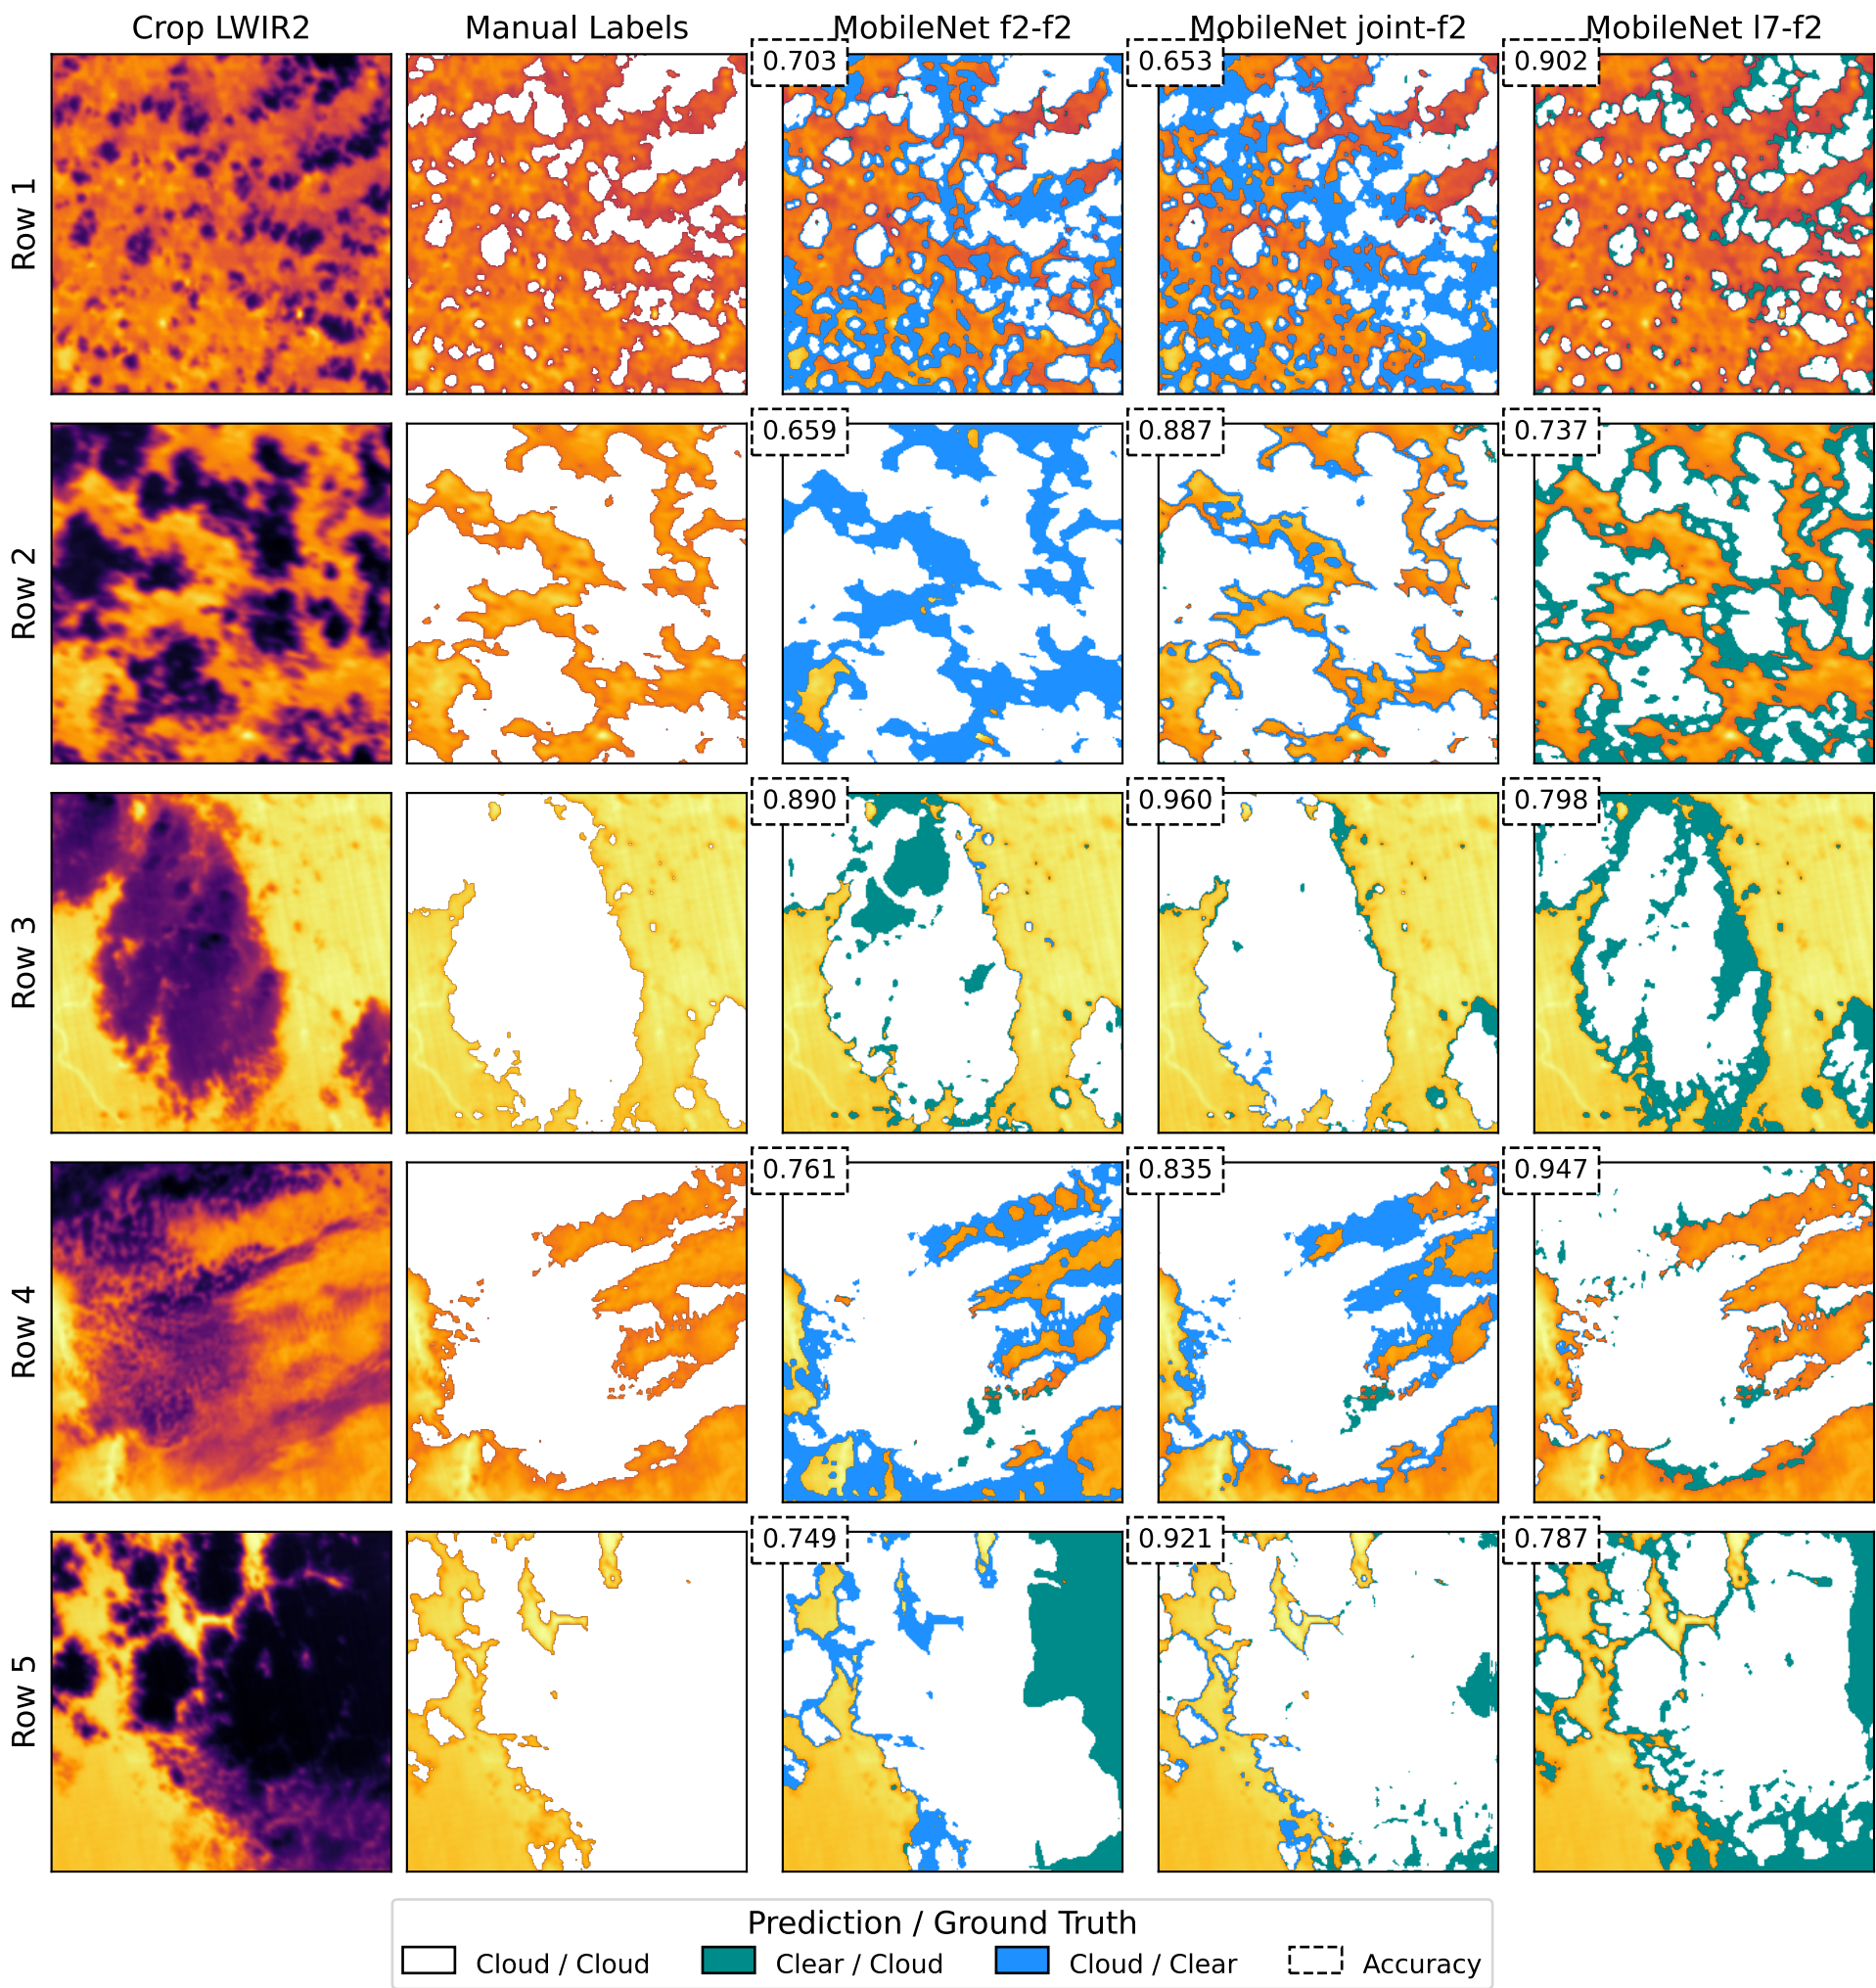

Supplement: supplementary_material [file attachment]

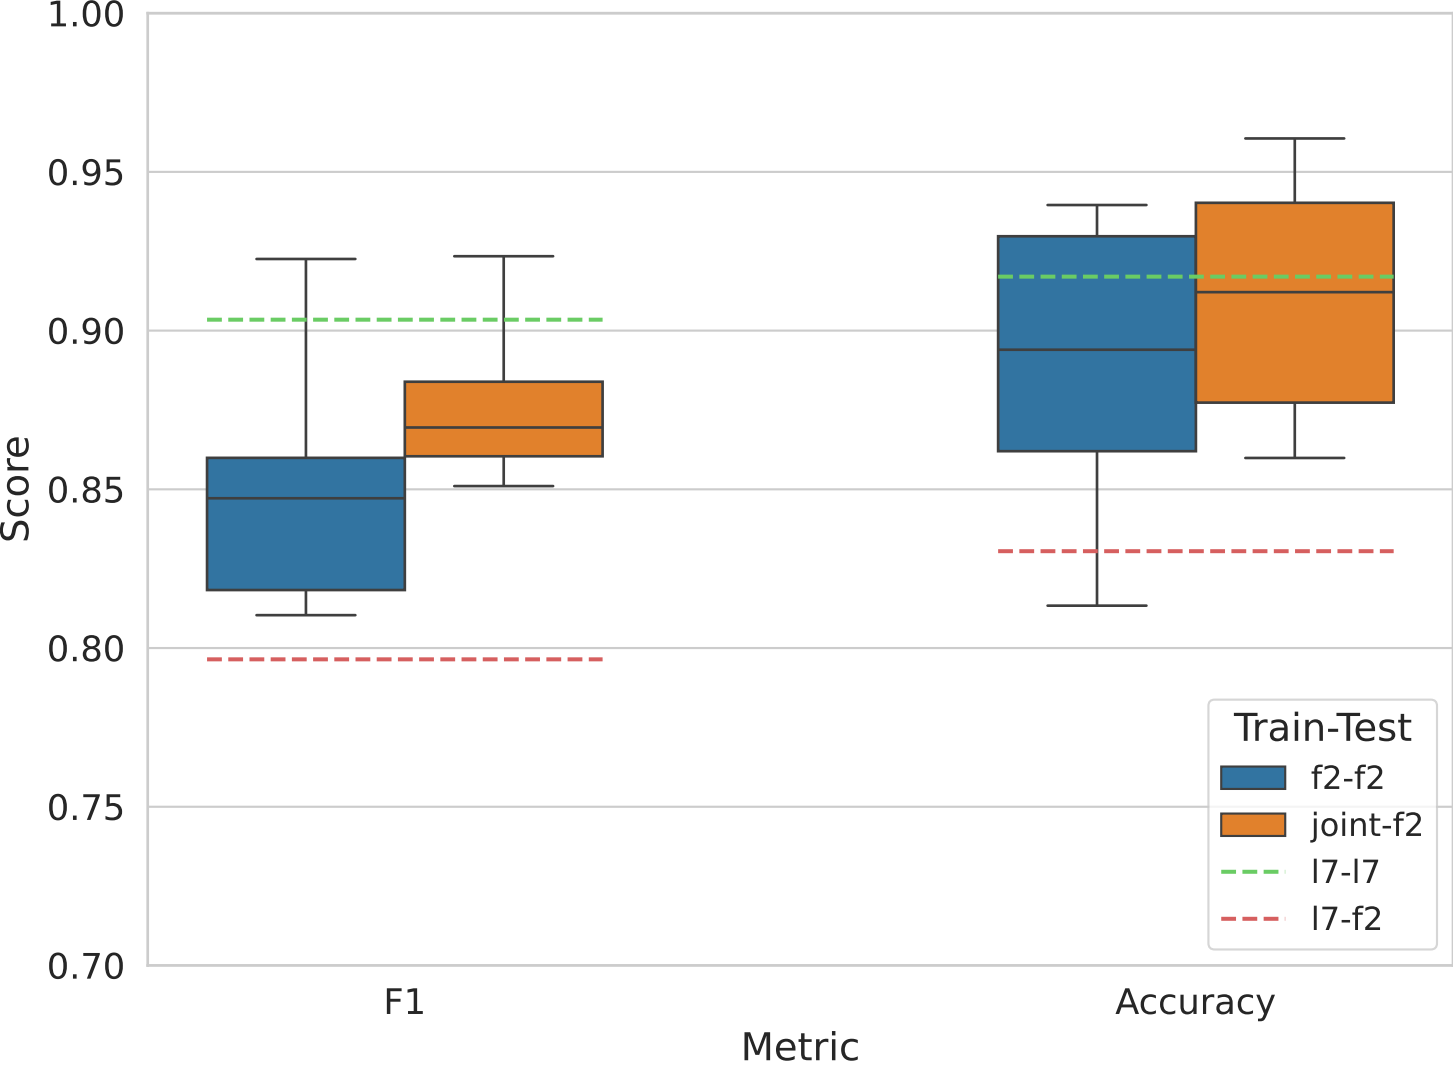

Supplement: supplementary_material [file attachment]

Precision-Recall Curves  
(Positive label 'Cloud')

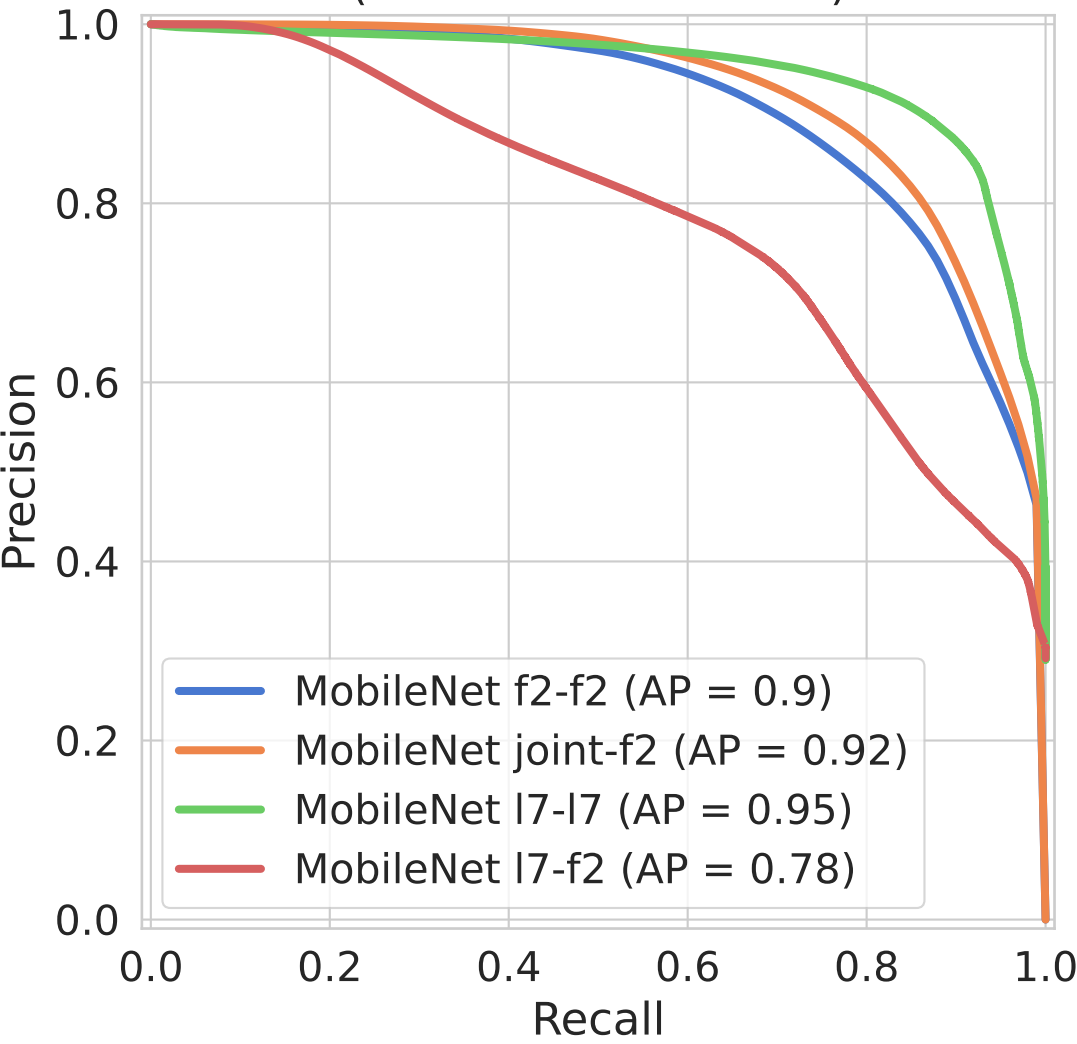

ROC Curves  
(Positive label 'Cloud')

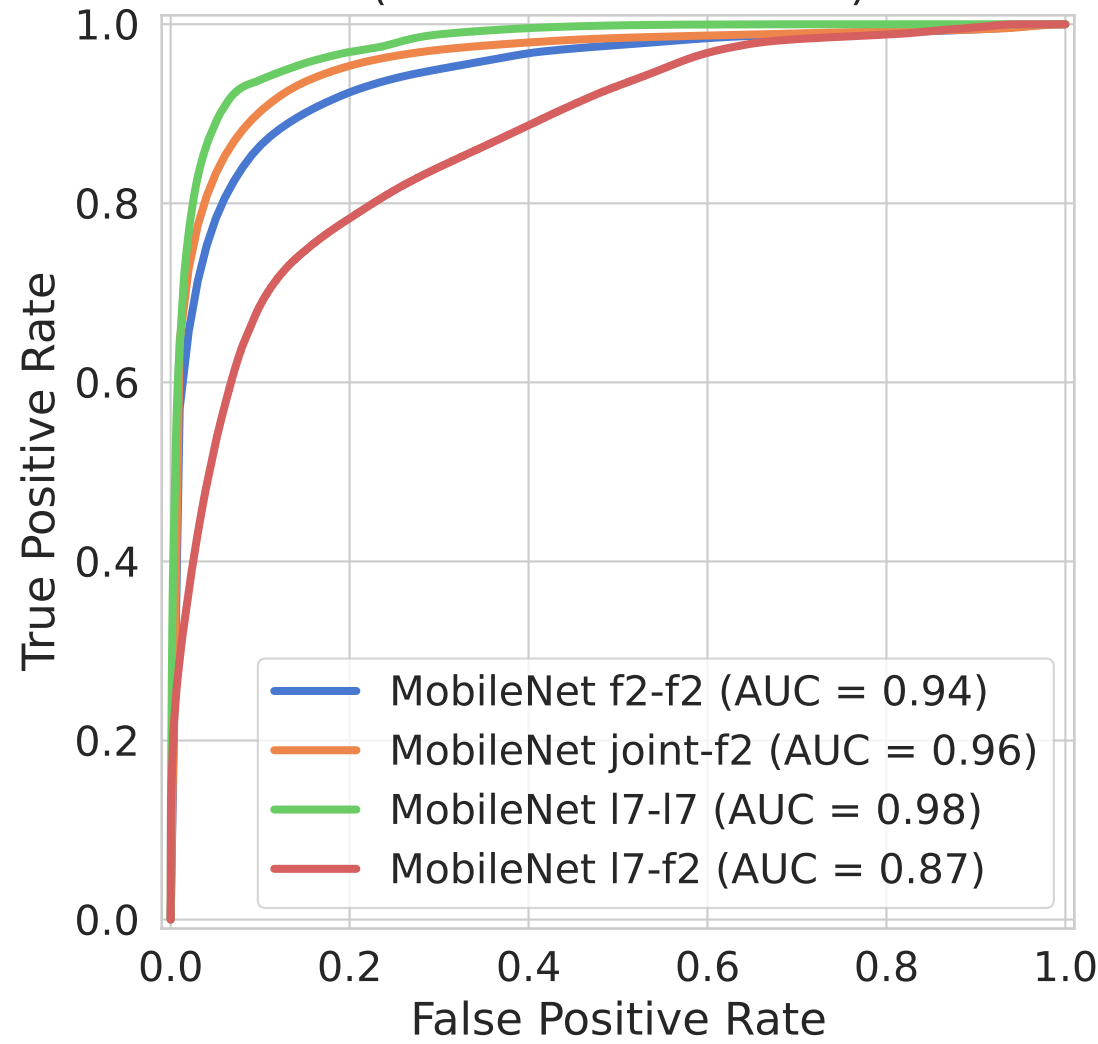

Supplement: supplementary_material [file attachment]
